# Supplementary material
Source: PubMed Central journal article supplement (PMC1326341)
Supplement: 4-embor901-s1.pdf [file 4-embor901-s1.pdf]

**Supplemental Figure 1. Activity of CHK2 expressed in human cells.** (A) *Recombinant CHK2 is phosphorylated at the activating site of Thr<sup>68</sup>.* Recombinant CHK2 purified from insect cells (lane 1) or control with no CHK2 (lane 2) was immunoblotted with the Thr<sup>68</sup> phospho-specific antibody to demonstrate that the protein is highly modified at this site. (B) *CHK2 is phosphorylated at Thr<sup>68</sup> in irradiated cells.* A375 cells were left untreated (lane 1) or irradiated with X-rays (5 Gy, lanes 2 and 3 or 10 Gy, lane 4 and 5). Cells were harvested 1 hour (lanes 2 and 3) or 3 hours (lanes 4 and 5) after irradiation. Lysates were immunoblotted with antibodies to CHK2 (top panel) or to Thr<sup>68</sup> modified CHK2 (bottom panel). (C) *Thr<sup>68</sup>-activated CHK2 responds in vitro to the BOX-V peptide.* An increasing volume of lysate from irradiated cells (from 1 to 100  $\mu$ l) containing Thr<sup>68</sup> modified CHK2 was immunoprecipitated with an anti-CHK2 antibody. After CHK2 capture, p53<sup>N1-66</sup> was added in kinase buffer and the incubations were continued at 30°C for 20 minutes without the BOX-V peptide (lanes 2-4) or with the BOX-V peptide (lanes 5-7). The reaction products were immunoblotted with the Thr<sup>18</sup>-phospho-specific antibody (arrow) since this is the predominant peptide-activated CHK2 phosphorylation site on p53.

**Supplemental Figure 2. CHK1 is regulated by p53 DNA-binding domain peptides.** The CHK2 homologue, CHK1, was evaluated in the p53 kinase assay to determine whether the docking mechanism extends to a related kinase. CHK1 has not been characterized as well as CHK2 towards p53 (Shieh et al., 2000), however, CHK1 may replace CHK2 as a damage-induced kinase in vertebrates (Zachos et al., 2003). (A and C). *The BOX-II and BOX-V domain peptides activate CHK1 phosphorylation of p53 at Ser<sup>20</sup>.* Kinase reactions containing p53<sup>N1-66</sup> and CHK1 were assembled without peptide (lanes 1) or with the indicated peptides (lanes 2 and 3). Reaction products were analysed for (A) p53<sup>N1-66</sup> or (C) p53[S15A]<sup>N1-66</sup> phosphorylation at Ser<sup>20</sup> (lanes 1-3). Protein band “a” represents migration of unphosphorylated or Ser<sup>20</sup>-phosphorylated p53<sup>N1-66</sup>, while protein band “b” is a kinase supershift that represents Thr<sup>18</sup> phosphorylation (as in Figure 2E and F). (B and D) *CHK1 exhibits constitutive activity towards Thr<sup>18</sup>.* Kinase reactions containing p53<sup>N1-66</sup> and CHK1 were assembled without peptide (lanes 1) or with the indicated peptides (lanes 2 and 3). Reaction products were analysed for (B) p53<sup>N1-66</sup> or (D) p53[S15A]<sup>N1-66</sup> phosphorylation at Thr<sup>18</sup> (lanes 1-3). Protein band “a” is unphosphorylated or Ser<sup>20</sup>-phosphorylated p53<sup>N1-66</sup>, while protein band “b” is a kinase supershift that represents Thr<sup>18</sup> phosphorylation. CHK1 has high basal Thr<sup>18</sup> kinase activity (B and D, lane 1) and is attenuated allosterically as a Thr<sup>18</sup> kinase by the BOX-II and BOX-V domain peptides (B and D, lanes 2 and 3). However, BOX-II and/or BOX-V domain peptides stimulate Ser<sup>20</sup> phosphorylation (A and C, lanes 2-3). Further, these data indicate that CHK1 targeting of Thr<sup>18</sup> can occur independent of Ser<sup>15</sup> phosphorylation and are consistent with the possibility that CHK1 can be an alternate Ser<sup>20</sup>/Thr<sup>18</sup> p53 transactivation domain kinase. The relatively complicated phenotypes of p53 missense mutants containing a Ser<sup>20</sup> phosphorylation site mutation to Ala<sup>20</sup> may be explained, in part, by adjacent Thr<sup>18</sup> phosphorylation by either CHK2, CHK1, or other homologous protein kinases.

## References

Zachos, G., Rainey, M.D. & Gillespie, D.A. (2003) Chk1-deficient tumour cells are viable but exhibit multiple checkpoint and survival defects. *EMBO J.*, 22, 713–723.

Supplemental Figure 1

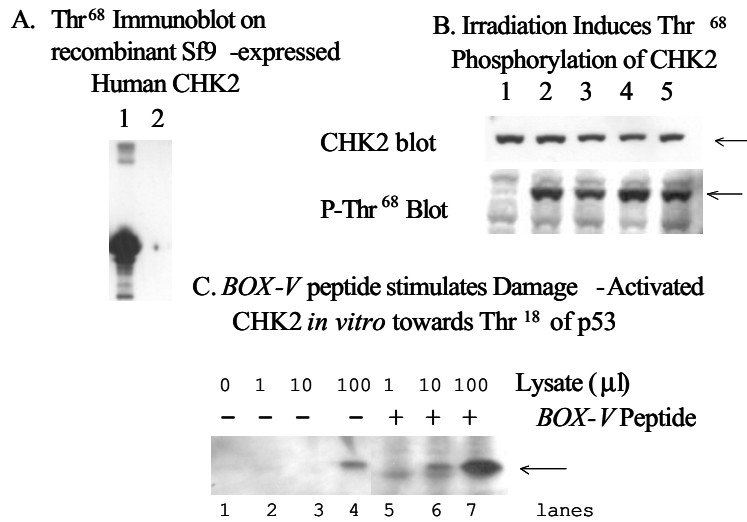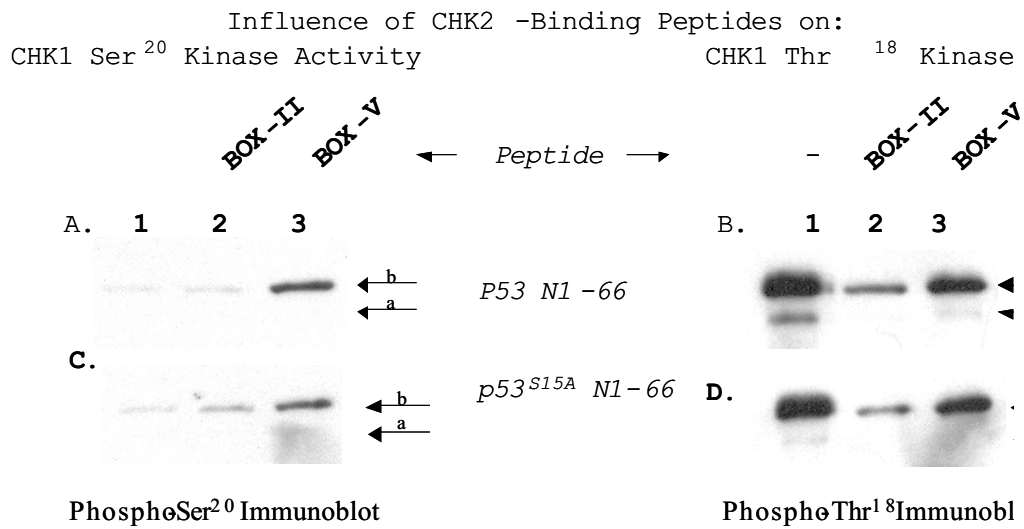

Supplemental Figure 2.
